# Supplementary material for: Deep learning with a multi-task convolutional neural network to generate a national-scale 3D soil data product: Particle size distribution of the German agricultural soil-landscape
Source: Copernicus journal article supplement (doi:10.5194/egusphere-2023-2386), 2023-11-10
Supplement: Supplementary file [file egusphere-2023-2386-AC1-supplement.pdf]

Dear Philippe, thank you for your critical reading and valuable comments. Please find our detailed replies below each of your comments:

This paper describes the predictions over Germany of particle size fractions (clay, silt and sand) using a CNN algorithm trained on around 3,000 locations with measured soil properties and classical soil covariates. There have been a lot of nation-wide applications of Digital Soil Map in the past and already some applications of CNN in Digital Soil Mapping. I therefore consider that the novelty of this paper is rather poor.

Reply: We disagree.

1. The generated three-dimensional continuous data product, which covers the particle size fractions of sand, silt, and clay in the agricultural soil-landscape of Germany, has a spatial resolution of 100 m and a depth resolution of 1 cm. It is the first data product of its kind.
2. The applied approach allows for the incorporation of soil profile data with the respective soil horizon boundaries without the need to compute target values at predefined soil depths. In contrast to this, the common depth function approach in DSM applications to transform the horizon-wise soil profile data into depth intervals introduces an additional source of uncertainty which is generally not accounted for.
3. Furthermore, the overall potential of the convolutional neural network (CNN) algorithm in generating data products that are both multidimensional and multivariate is demonstrated in this nationwide application.

We will further enhance these aspects throughout the manuscript.

However, I notice that the authors used a genetic algorithm to train the hyperparameters of their CNN, which would perhaps constitute a novelty for the application of CNN in Digital Soil Mapping if the added value of this pre-processing step should be clearly demonstrated, which is not in this present version.

Reply: Please compare lines 65-69: *“Like many other machine learning algorithms, CNNs can only develop their full potential by applying an optimization approach for hyperparameter tuning (Gebauer et al., 2022). Still, few researchers have attempted to tune the CNN hyperparameters in predictive soil mapping studies, despite recent work showing the importance (e.g. Wadoux et al., 2019; Omondiagbe et al., 2023; Taghizadeh-Mehrjardi et al., 2020).”*

Contrary to what the authors argued in the conclusion, I do not think that the efficiency of a CNN algorithm is clearly demonstrated from the results that are presented. Indeed, using CNN does not increase the performances obtained earlier on the same dataset (topsoil particle size fractions) by a more simple-to-use learning algorithm (gradient boosted tree, Gebauer et al) and obtained very poor prediction performances for particle size fractions beyond 30 cm depth (figure 3 bottom line).

Reply:

1. We understand your concern. Therefore, we critically discuss the performance of our modeling approach using the CNN algorithm in section 3.3 Predictive Performance. Please compare e.g. lines 285-290: *“Below 26 cm, the RMSE increases abruptly. At 40 cm depth, the RMSE values are 20.9, 16.5, and 11.8 mass-%. The decrease in model performance with depth has often been reported (Taghizadeh-Mehrjardi et al., 2020; Ließ, 2022; Poggio and Gimona, 2017). One reason could be the frequent changes in parent material. Considering the high percentage of profile sites with changes in parent material it is likely that the available data for SCORPAN P is causing this increase in uncertainty. The SCORPAN P proxies consist of geological maps of different scale and quality, and there may be some inconsistencies in how depth is represented. These maps may not fully capture the nuances of the underlying parent material.”*
2. We agree that there is still work that needs to be done. Please compare lines 386-389 of the Conclusions Section: *“Overall, there is a high demand to test the required complexity and depth*

*of convolutional neural network models to produce soil data cubes of sufficient quality without excessive use of computing capacities. The same applies to the inclusion of the landscape context surrounding each soil profile, because vicinity size, filter size, and predictor resolution likely affect one another."*

3. However, we are not aware of any other machine learning algorithm applied in the context of DSM for the generation of data products that are both multidimensional and multivariate. Accordingly, the presented manuscript indicates the high potential for CNN in pedometric modeling approaches to generate data products that are both multidimensional and multivariate, but we conclude that further investigation is required.

Furthermore, I have some additional questions and comments along the text :

L94: explain how the horizon boundaries were taken into account in the vertical sampling scheme

Reply: This reviewer's comment refers to the following statement *"Samples were taken for each of the 0-10, 10-30, 30-50, 50-70, and 70-100 cm depth increments, while taking horizon boundaries into account."*

It means that samples were taken separately for each horizon fragment occurring within the respective depth increment. For example: If a horizon boundary occurred at 63 cm depth a sample was taken for the 50-63 cm section and another for the 63-70 cm section. We will specify this in the manuscript to add clarity.

L173: I do not understand why the authors fed their CNN with soil observations containing 100 soil layers of 1cm whereas soil particle fractions were only measured at 5 depth intervals. This uselessly overload the CNN without bringing more significant information. It consequently increases the number of parameters and hamper the convergence of the algorithm toward a satisfactory prediction.

Reply:

1. The soil particle size fractions were not only measured at depth intervals. Please compare our reply to the previous comment.
2. In soil science, horizon boundaries are usually recorded at a precision of 1 cm. To consider the horizontation in the model training the applied 1 cm resolution with depth is a fair data representation and not a useless overload.
3. We trained our CNN model to extract the best possible information from the data. Now you may argue whether the available number of soil profiles is sufficient to capture soil complexity in the agricultural soil-landscape of Germany. Please compare lines 382-385: *"... the potential for this deep learning approach to understand and model the complex soil-landscape relation is virtually limitless. The patch-based CNN for 3D multivariate soil modeling has only data-driven limitations. ... access to the vast buried treasure of soil profile data and the steadily improving availability, quality, and resolution of gridded landscape data is essential."*

L187: A thorough presentation of the importance of missing data per soil property and soil depth increment is necessary. To my experience, the numbers of missing data generally increase with depth (soils are not all 100 cm thick). This could also explain why the prediction performances collapse beyond 30 cm

Reply: Please remember these are soils under agricultural use, not soils in general. Please compare lines 186-196 for the requested details *"Table 3 indicates the size of the datasets used for model training to predict soil texture ...The different sizes result from excluding predictor arrays with missing data, and/ or profiles with missing texture data in part of the profile.....The decrease from 2917 to 2740 sites ...is due to missing texture data in part of the subsoil."*

L190 : I disagree with this statement. It is quite easy to find transnational covariates as shown by the number of papers presenting continental or global applications of DSM

Reply: Soil texture predictions heavily rely on data proxies to the soil forming factor parent material. Spatially continuous representations of this factor are not often available beyond national boundaries. The same applies to expert information contained in conventional map products. We will further explain this aspect in the manuscript.

L 206 : "All predictors were recoded into dummy variables": similarity between the categorical values not taken into account?

Reply: Unfortunately, the similarity between categorical values is defined, neither for the included soilscape map nor the parent material map. This is a common problem with conventional map products. To define this similarity is a time-consuming workload beyond the objective of this paper.

1. 238 : No data augmentation? could be easily done by rotating/mirroring windows

Reply: The comment refers to lines 237-238: *"The VI plots exhibit boxplots of twenty-five VI values for each predictor due to the five times repeated 5-fold CV procedure (outer CV cycle)."* We decided to show the distribution of the VI values instead of the mean values.

L245-247: As a pedologist, I am very surprised to read that 44,8% of the soil observations sampled in Germany are polyphasic soils with more than one parent material. Please check this information from an experienced soil scientist.

Reply: The reviewer comment refers to lines 243-247 *"Regarding the 2740 profiles included in the dataset for 3D modeling with a 5 × 5 cell patch size, field data annotations show that 44.8% of the soil profiles have one change in parent material up to a depth of 100 cm..."*

You may easily check yourself. The complete dataset of the agricultural soil inventory (3103 profiles) has a similarly high percentage of soil profiles with at least one change in parent material within the top 100 cm.

The dataset can be accessed from Poeplau, C.; Don, A.; Flessa, H.; Heidkamp, A.; Jacobs, A.; Prietz, R. *First German Agricultural Soil Inventory—Core Dataset*; Open Agrar Repositorium: Göttingen, Germany, 2020. <https://doi.org/10.3220/DATA20200203151139>.

Currently, there is a bug in the reference list, which we will correct upon resubmission.

L247: A table showing the main statistical indicators of the distribution of soil properties (mean, variance, min, max etc...) and histograms would be more informative than figure 2. In particular, we need to know the variance to interpret the RMSEs that are given further

Reply: Figure 2 indicates the boxplot values of the sand silt and clay content throughout depth. We will additionally add a line to indicate the mean values.

L276: RMSE should be usefully completed by other prediction performance indicators such as R<sup>2</sup>, Model Efficiency Coefficient (MEC) or LCCC. some scatterplots of the measured versus predicted soil properties should be added to give more insight into the behaviour of the model.

Reply: The RMSE (1) allows for the direct comparison with other soil texture data products covering Germany, which were evaluated on the same test set data, and (2) can be used to account for uncertainty propagation when using the data product. Providing additional performance indicators would provide little additional insight in this context. Scatter plots would amount to 300 individual

plots for the 3D predictions. As a compromise, we will add scatter plots with  $R^2$  values for selected soil depths as supplementary material.

L284 : The bottom line curves show clearly stair-step shapes. Any interpretation of that?

Reply: Please compare Lines 285-290: *“The decrease in model performance with depth has often been reported ... One reason could be the frequent changes in parent material. Considering the high percentage of profile sites with changes in parent material it is likely that the available data for SCORPAN P is causing this increase in uncertainty. The SCORPAN P proxies consist of geological maps of different scale and quality, and there may be some inconsistencies in how depth is represented. These maps may not fully capture the nuances of the underlying parent material.”*

Beyond this, we have no further explanation for the step-wise decrease in model performance with depth.

L287-291: This interpretation does not convince me. Normally, the P covariate should be more related with deep horizons than with superficial ones as the former are expected to be closer to the parent rock described in geological database. Consequently, the soil property predictions should be better for deep horizons if the limiting factor was the P covariate.

Reply: The reviewer refers to lines 285-290: *“The decrease in model performance with depth has often been reported ... One reason could be the frequent changes in parent material. Considering the high percentage of profile sites with changes in parent material it is likely that the available data for SCORPAN P is causing this increase in uncertainty. The SCORPAN P proxies consist of geological maps of different scale and quality, and there may be some inconsistencies in how depth is represented. These maps may not fully capture the nuances of the underlying parent material.”*

We agree that SCORPAN P is expected to have higher explanatory power for deeper soil horizons, while the explanatory power of other soil-forming factors (R, O, C) decreases with depth. However, as a consequence of this, data proxies to SCORPAN P which may explain the parent material only to a very limited extent lead to a decrease in predictive model performance with depth. We will add this general understanding to avoid confusion.
