# Supplementary material for: Deep learning with a multi-task convolutional neural network to generate a national-scale 3D soil data product: Particle size distribution of the German agricultural soil-landscape
Source: Copernicus journal article supplement (doi:10.5194/egusphere-2023-2386), 2023-11-10
Supplement: Supplementary file [file egusphere-2023-2386-AC3-supplement.pdf]

Dear reviewer, thank you for your critical reading and valuable comments. Please find our detailed replies below each of your comments.

The paper uses a CNN algorithm in a DSM exercise in Germany, using a relatively large collection of soil profiles. In general, a well written manuscript but it would benefit from reducing the use of "data science" jargon and more consistent citations.

Reply: There are two sentences using the term "data science". We will replace it and review the citations.

My main concern with the manuscript is that it fails to demonstrate how their approach is more effective (as stated in the abstract and conclusions). They only provide results for two CNN variations without comparing it with conventional DSM models (without spatial context), and they obtain inferior performance compared to previous studies using the same dataset. In addition to that, they use 1 cm slices instead of using a depth function stating that it is better but without showing any results to support it.

Reply:

**CNN Approach:**

1. We are not aware of any other machine learning algorithm applied in the context of DSM for the generation of data products that are both multidimensional and multivariate. The sentence in the abstract reads *"The effectiveness of the convolutional neural network (CNN) algorithm in producing multidimensional, multivariate data products is demonstrated"*
2. We understand your concern with regard to model performance. Therefore, we critically discuss the performance of our modeling approach using the CNN algorithm in section 3.3 Predictive Performance.
3. We agree that there is still work that needs to be done. Please compare lines 386-389 of the Conclusions Section: *"Overall, there is a high demand to test the required complexity and depth of convolutional neural network models to produce soil data cubes of sufficient quality without excessive use of computing capacities. The same applies to the inclusion of the landscape context surrounding each soil profile, because vicinity size, filter size, and predictor resolution likely affect one another."*

Accordingly, the presented manuscript indicates the high potential for CNNs in pedometric modeling approaches to generate data products that are both multidimensional and multivariate, but we conclude that further investigation is required.

**1 cm slices:**

Samples were taken as bulk samples mixed from several samples throughout a soil horizon, a common if not the standard procedure in soil surveys. Horizons in soil science are mostly defined by noticeable changes from one horizon to another in terms of color and/ or texture. In line with this, the soil texture data of the agricultural soil inventory does not correspond to a specific depth but a depth interval. Accordingly, it is reasonable to assign to each centimeter within each depth interval the same value.

In contrast, training a depth function usually requires assigning the bulk sample value to a specific soil depth. It then models gradual changes toward the mean values of the above and below-lying horizons and, thereby, somehow counteracts the rationale behind the horizon-wise sampling procedure.

## Specific comments

- The abstract needs more work. It reads like the summaries for non-experts that some journals require.

Reply: We will add further details to the abstract.

- L56: Behrens et al. (2018) did not use a CNN.

Reply: Thank you. We will replace it with other references.

- L61: You are talking about CNNs applied in the context of soil mapping but, again, some of the references are not related to that (Behrens et al. (2010) and Behrens et al. (2014)). Considering that the list is not very long, you are missing some references.

Reply: Thank you. We will revise the list of references.

- L68: I am not sure that this is true. In most of publications, I have seen have some hyperparameter optimisation such as grid or random search.

Reply: The reviewer refers to lines 65-86: *“Like many other machine learning algorithms, CNNs can only develop their full potential by applying an optimization approach for hyperparameter tuning (Gebauer et al., 2022). Still, few researchers have attempted to tune the CNN hyperparameters in predictive soil mapping studies, despite recent work showing the importance (e.g. Wadoux et al., 2019; Omondiagbe et al., 2023; Taghizadeh-Mehrjardi et al., 2020).”*

We disagree. Grid or random search are parameter tuning techniques but do not involve an optimization approach.

- L73: is the 3D model often worse than the 2D? any reference?

Reply: Please refer to lines 285-287 (discussion section): *“The decrease in model performance with depth has often been reported (Taghizadeh-Mehrjardi et al., 2020; Ließ, 2022; Poggio and Gimona, 2017).”*

We'd rather refrain from additionally adding it to the last paragraph of the introduction section. Its last sentence merely gives the explanation of why we include the topsoil predictions as a benchmark. Lines 69-74: *“We will demonstrate an approach for implementing multivariate regression to generate a national-scale data product of the 3D spatial variation of the particle size distribution for the agricultural soil-landscape of Germany. It will be obtained with a single model employing a patch-wise multi-target CNN to predict three particle size fractions, sand, silt, and clay simultaneously at high vertical resolution until 100 cm depth. Genetic algorithm optimization will be applied for hyperparameter tuning. A CNN model to generate a topsoil data product (2D) is included to provide a benchmark since often the more complex 3D model training results in a lower performance.”*

- L125: You used coordinates as covariates, hoping to represent spatial patterns that other covariates do not capture. What kind of patterns would that be?

Reply: Pedogenesis in Germany has been ongoing for more than 10,000 years while the data we use to approximate the soil-forming factors relates to the last decades only. So there will always be some gap that we seek to cover by including spatial position. We will add this explanation to the manuscript.

- L135-146: I understand that you are trying to summarise a lot of concepts in a single paragraph but it does not read well and it is very inaccurate. E.g. the description of the learning rate is very simplistic. A high value not always speeds up the learning process and a low value not always ensures that the network succeeds in learning the predictor-response relation. In general, I understand what you mean because I have worked with CNNs but another reader will not get any value from this.

Reply: We will adapt the text section to improve understandability.

- L150-162: A lot of "data science" jargon here. Also, you are constantly mixing CNNs, CNNs applied to spatial modelling and the specific CNN architecture that you use. Please, do not mix them all in one paragraph. For instance, towards the end you mention that "the output is flattened before it enters a sequence of dense layers". That is specifically for your CNN but the text reads as if it is true for all CNNs.

Reply: Thank you. We will better separate the structure of our CNN models from the general explanation. We do not understand what you mean by "data science" jargon, though. Could you provide examples?

- L167: "CNNs cannot handle this type of input". I am OK with your pragmatic approach of limiting the window size to avoid missing data but CNNs can handle missing data. I assume that you are specifically talking of missing data represented by the float "NA".

Reply: We would be glad to learn which CNN implementation could handle missing data without replacing them previously. Missing data in R are represented by NA.

- Section 2.6: A lot of "new" genetic algorithm jargon. Islands? Migration? I do not think GA is common enough to skip those concepts. The reader would benefit with a brief introduction of the algorithm that you used.

Reply: Thank you. We will adapt this section.

- Section 2.7: No reference to the method? It sounds like a ad hoc implementation of Shapley values but you do not specify any of the details. Number of permutations? All the predictor simultaneously? Please add more details.

Reply: The reviewer refers to Lines 232-238: *"Each predictor's importance was determined by permuting the predictor in the test set prior to model application. Any predictor-response association relating to that predictor was thus deleted. The resulting relative increase in the predictive RMSE was then assigned to the respective predictor as variable importance (VI). This VI estimation was performed for each of the three particle size fractions as well as for all depth slices (3D prediction). The values from five permutations were averaged. The VI values for the dummy variables were generated by aggregating each categorical predictor. The VI plots exhibit boxplots of twenty-five VI values for each predictor due to the five times repeated 5-fold CV procedure (outer CV cycle)."*

We will add a reference for permutation-based variable importance calculations. The number of permutations is given in line 236.

- Table 3: I have seen kernels with even number of pixels (e.g. 2x2) in a couple of DSM publications and still have not seen a justification of why an asymmetrical convolution would be desirable (they introduce aliasing errors). That is why in signal processing, kernel operations such as convolutions are

often preferred to be symmetrical (e.g. 3x3). You need to be careful when defining the search space for your hyperparameter tuning.

Reply: The search space for hyperparameter tuning only considers symmetrical kernels. Please refer to Table 2, parameter P2: kernel size in both dimensions.

- Section 3.2: You are missing information about the convergence of the GA optimisation. Also, did you get any insights from this process? You have a population of 500 individuals, and assuming that you ran it for at least 20 generations, you trained 10,000 models. In my experience, that is much longer than a well defined grid search. For instance, a dropout rate of 0.1019826 (from your 3D, 5 cells model) is not different from a dropout rate of 0.1.

Reply:

Please refer to Lines 282-230: *"The total number of iterations was set to 200, and the number of consecutive generations without an improvement in the best fitness value before the GA was terminated was set to 20."*

To test only a very limited set of selected tuning parameter combinations (grid search) may result in good model performance or it may not. The trouble is how do you select the right values and combinations while continuous parameters are involved? In these cases, an optimization approach pays off. Otherwise, you might risk missing the optimal tuning parameter set.

- L274. I would not call that "uncertainty of the model predictions".

Reply: The sentence will be adapted.

- L306. Did you try it and observed artifacts? It is quite common to assign -1 or other values to missing data.

Reply: The convolutional layers in CNNs are looking for spatial patterns. For the area outside Germany we would assume a single value while replacing missing data by -1, and highlight the national border. Consequently, we might risk extracting the national border as a feature for e.g. parent material.

- L309-312: You mentioned that your method does not introduce additional uncertainty (compared to standard intervals methods such as equal area spline) but that is not necessarily true. Since you subdivided into 1cm slices, I assume you have the same value for each slice within the original layer (e.g. 10 slices with the same clay content within a 0-10cm layer). That procedure is also a depth function but defined by you instead of fitted to data. If you could show that this method is actually better than the traditional DSM approach, it would be a valuable contribution.

Reply:

Samples were taken as bulk samples mixed from several samples throughout a soil horizon, a common if not the standard procedure in soil surveys. Horizons in soil science are mostly defined by noticeable changes from one horizon to another in terms of color and/ or texture. The available soil texture data does not correspond to a specific depth but a depth interval. Accordingly, it is reasonable to assign to each centimeter within each depth interval the same value.

Training a depth function usually requires assigning the bulk sample value to a specific soil depth. It then models gradual changes toward the mean values of the above and below-lying horizons and, thereby, somehow counteracts the rationale behind the horizon-wise sampling procedure.

- Section 3.4: Interesting that the model mostly uses categorical covariates. How many of the 119 predictors are "dummy" classes? Did you normalise/standardised the contiguous covariates?

Reply: 37 of the 119 predictors are dummy classes originating from the categorical covariates. All contiguous covariates were scaled to the range 0-1. Please refer to lines 207-208.
